# Supplementary material
Source: PubMed Central journal article supplement (PMC5311397)
Supplement: AEM.02503-16_zam999117674s1.pdf [file AEM.02503-16_zam999117674s1.pdf]

Supplemental Figure 1

A

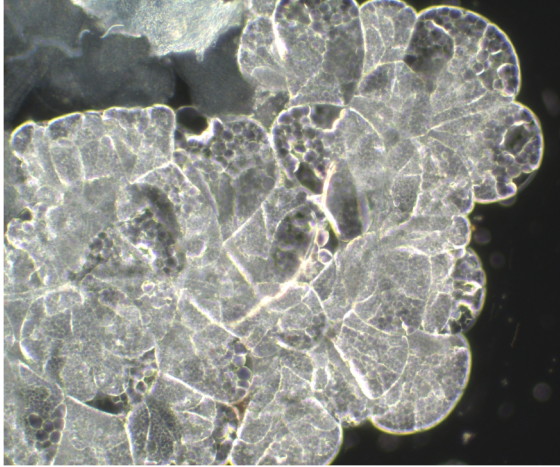

B

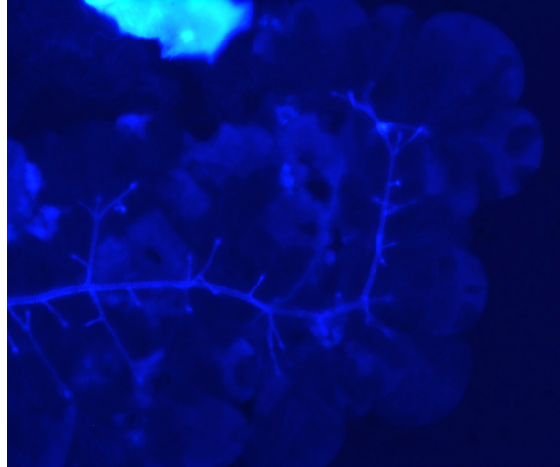

C

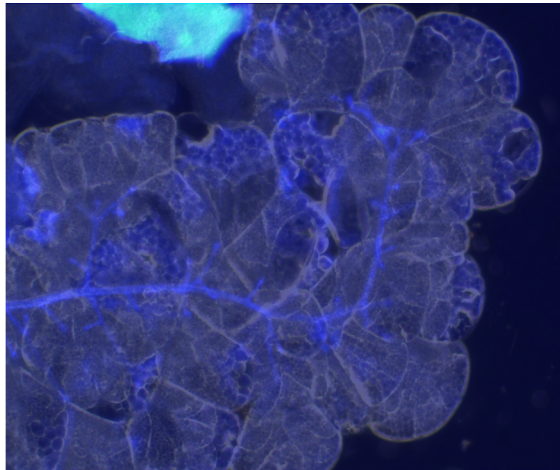

Supplemental Figure 2

A.

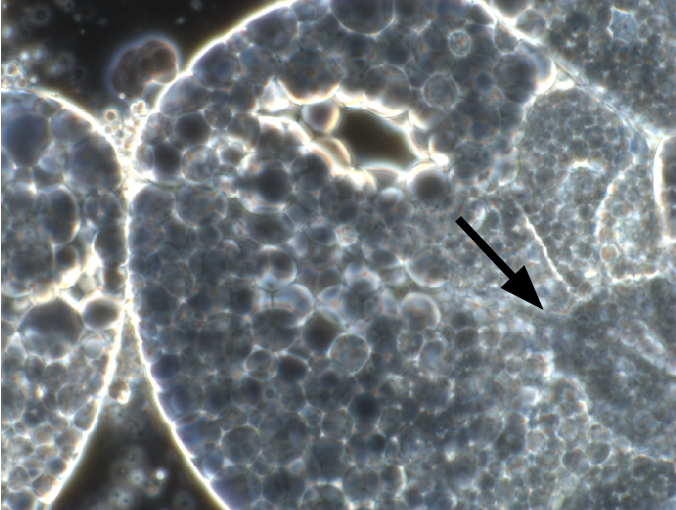

B.

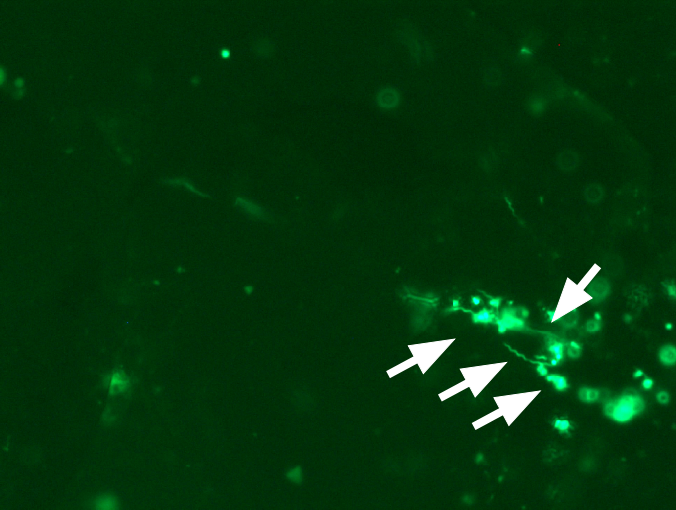

## Supplemental Figure legend.

**Figure S1.** Salivary glands visualized by dark field (**A**), fluorescence under the DAPI filter (**B**), and the images overlaid (**C**). The ducts autofluoresce and branch to the acini (**B** and **C**).

**Figure S2.** Evaluation of salivary gland acini after a transmission bloodmeal. An acinus was viewed with a 63x oil objective by dark field (**A**), fluorescence (**B**), and the images were overlaid (**C**). White arrows (**B**) point at fluorescing spirochetes and the scale bar is shown at the bottom left of each image.

**Movie S1.** Video of live *B. turicatae-gfp* in the blood after transmission by tick bite.

**Movie S2.** Video of live *B. turicatae-gfp* in the midgut of starved ticks.
